# Supplementary material
Source: publisher figshare collection journal article supplement (https://gsapubs.figshare.com/ndownloader/files/22411335)

G1: Hierarchical clustering

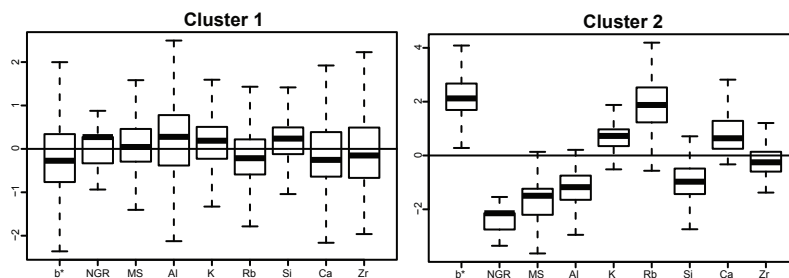

G1: Model clustering

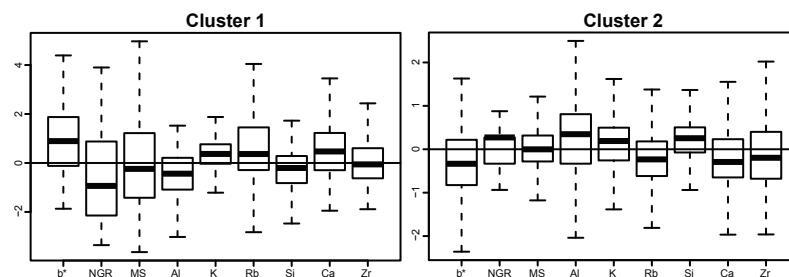

G2: Hierarchical clustering

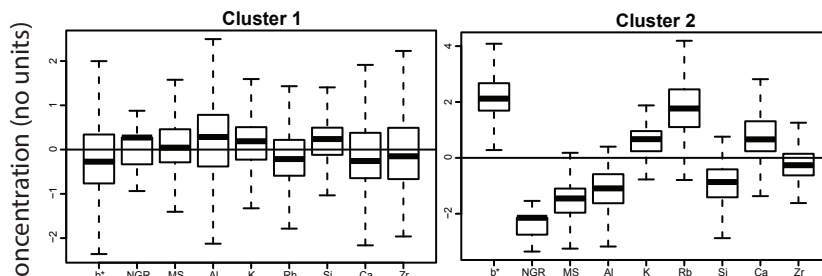

G2: Model clustering

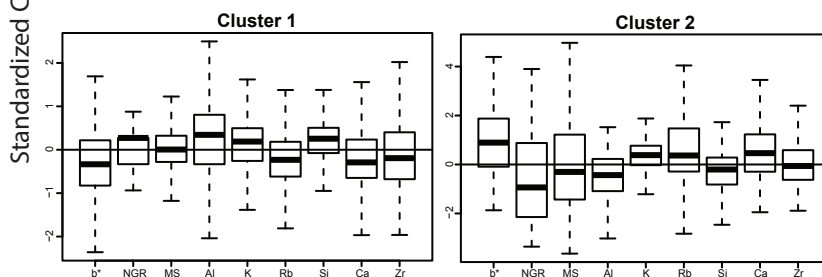

G3: Model clustering

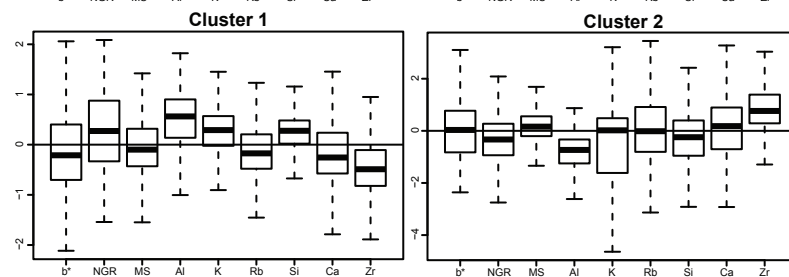

G3: Hierarchical clustering

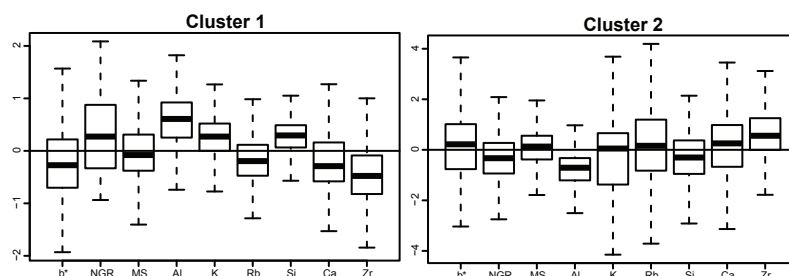

Supplement: Supplementary file 1 [file 22411335]
