# Supplementary material
Source: publisher figshare collection journal article supplement (https://gsapubs.figshare.com/ndownloader/files/22411335)

# Mud/Diamict Lithostratigraphy

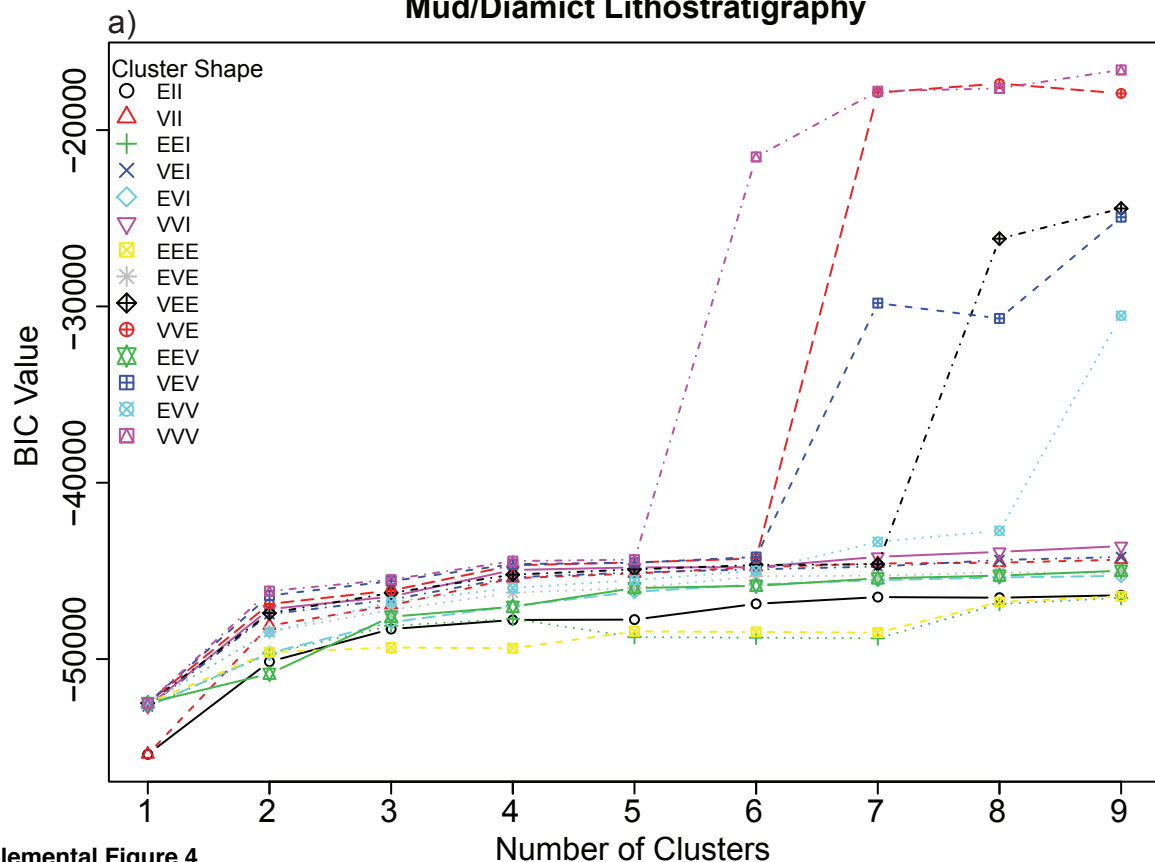

Supplemental Figure 4  
Penkrot et al  
MS# GS1635

# Diamict-only Lithostratigraphy

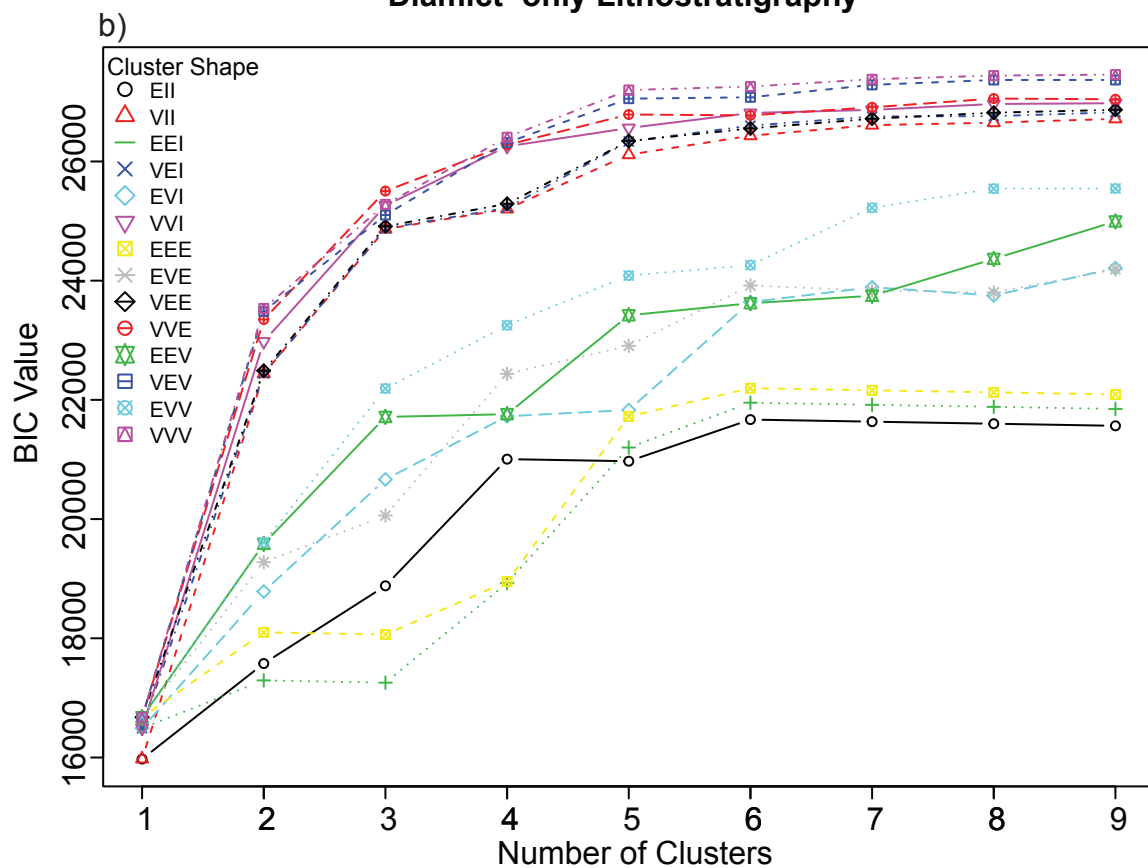

Supplement: Supplementary file 4 [file 22411335]
