# Supplementary material
Source: publisher figshare collection journal article supplement (https://gsapubs.figshare.com/ndownloader/files/22411335)

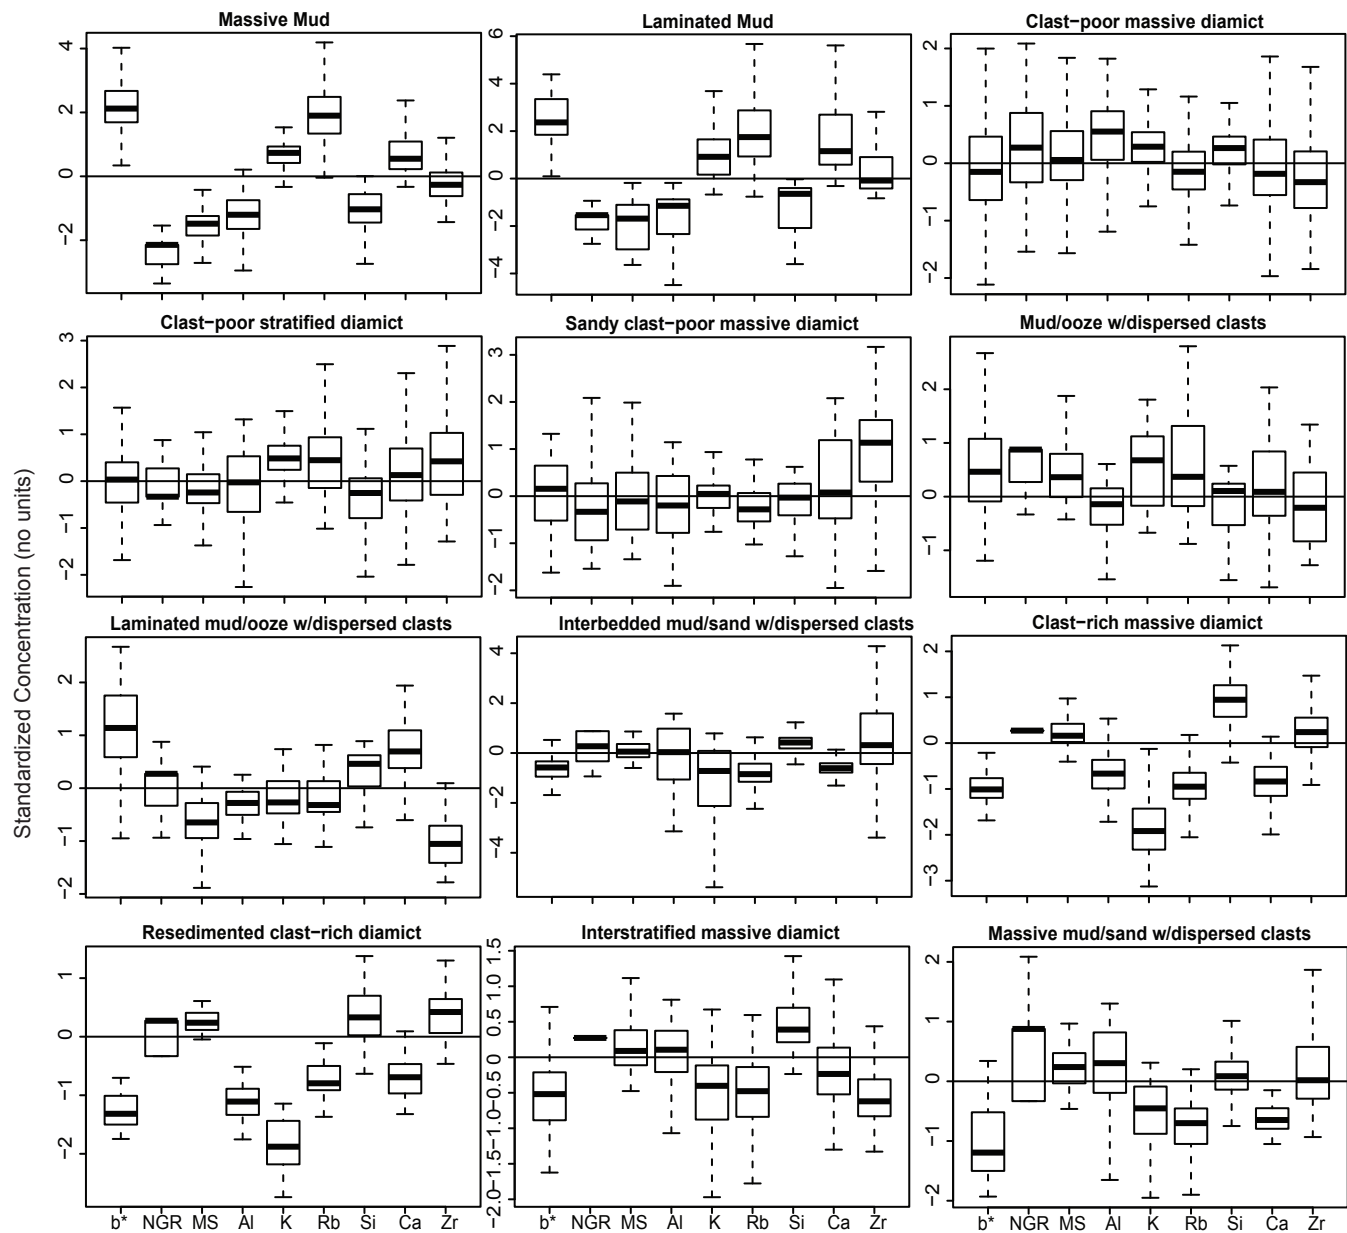

**Supplemental Figure 1**  
**Penkrot et al**  
**MS# GS1635**

Supplement: Supplementary file 2 [file 22411335]

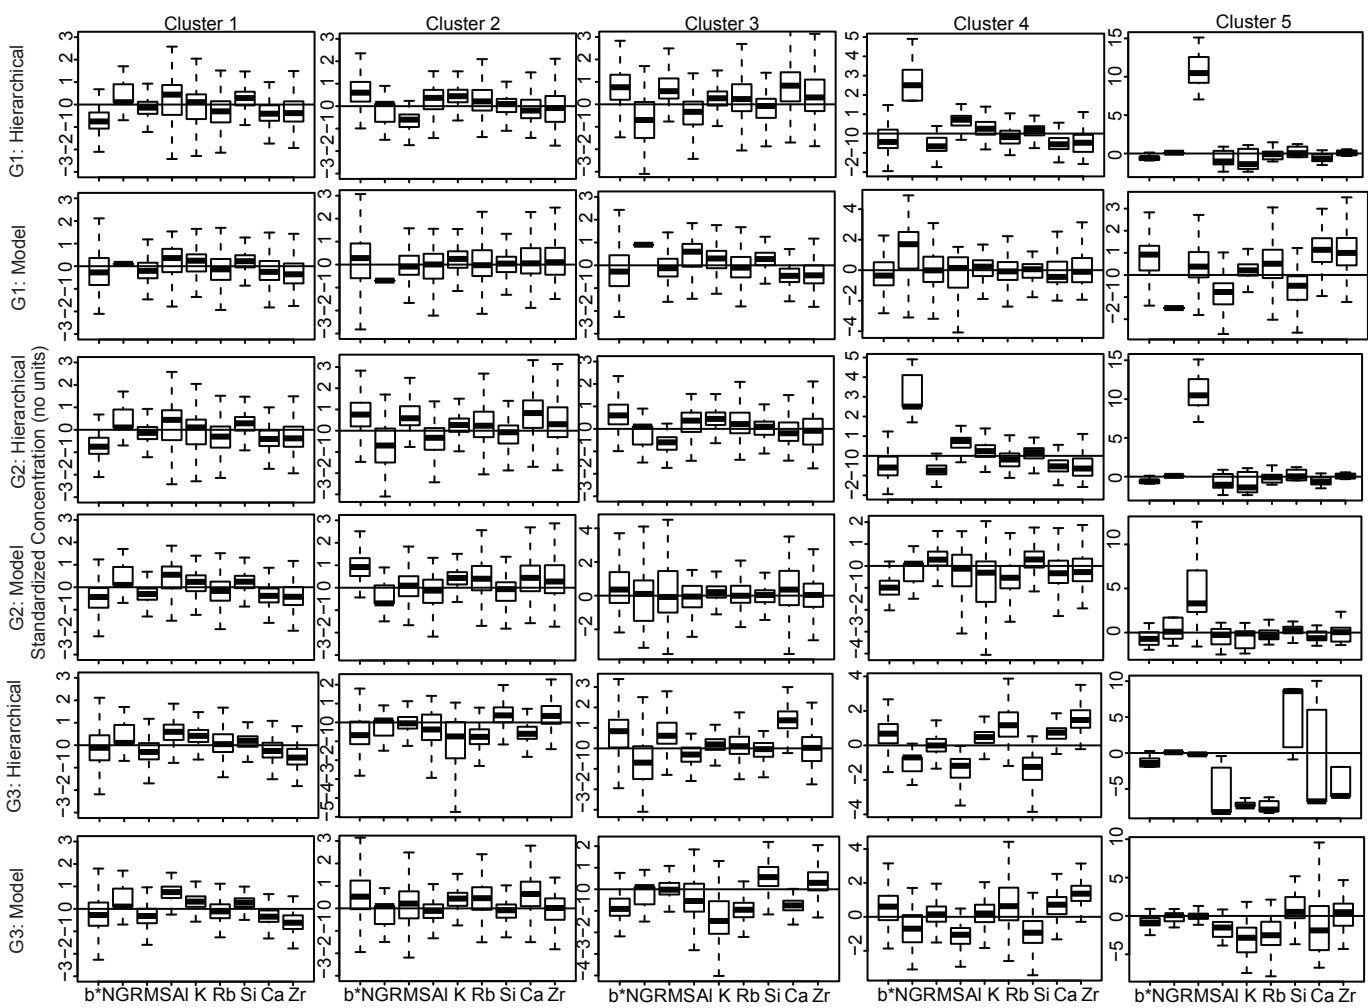

**Supplemental Figure 3**  
**Penkrot et al**  
**MS# GS1635**

Supplement: Supplementary file 3 [file 22411335]

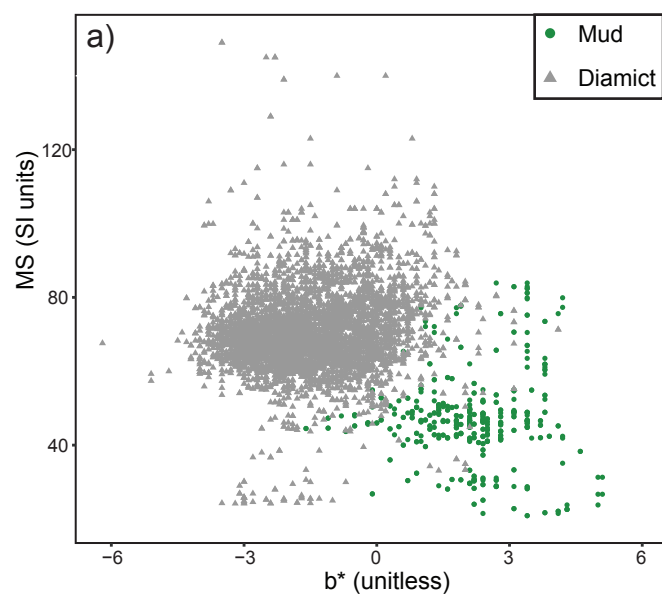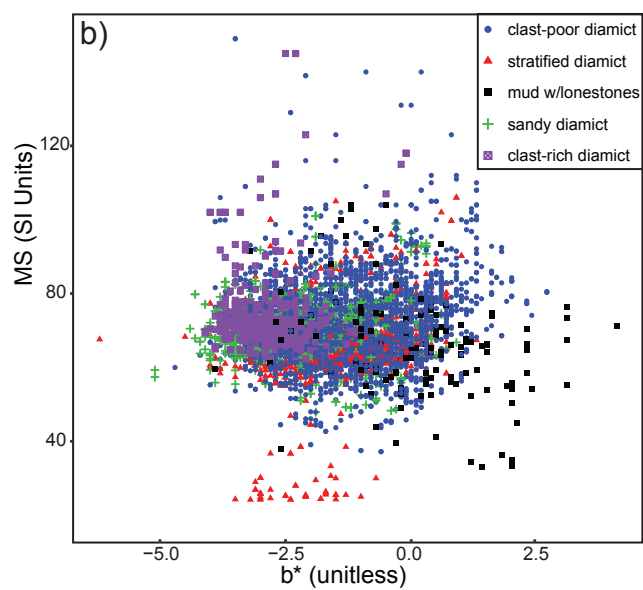

**Supplemental Figure 5**  
**Penkrot et al**  
**MS# GS1635**

Supplement: Supplementary file 5 [file 22411335]
